# Supplementary material for: Estimating supraglacial lake depth in West Greenland using Landsat 8 and comparison with other multispectral methods
Source: Copernicus journal article supplement (doi:10.5194/tc-10-15-2016), 2016-01-15
Supplement: Supplementary file [file tc-10-15-2016-supplement.pdf]

Supplement of The Cryosphere, 10, 15–27, 2016  
<http://www.the-cryosphere.net/10/15/2016/>  
doi:10.5194/tc-10-15-2016-supplement  
© Author(s) 2016. CC Attribution 3.0 License.

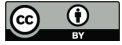

*Supplement of*

## **Estimating supraglacial lake depth in West Greenland using Landsat 8 and comparison with other multispectral methods**

**A. Pope et al.**

*Correspondence to:* A. Pope ([allen.pope@post.harvard.edu](mailto:allen.pope@post.harvard.edu))

The copyright of individual parts of the supplement might differ from the CC-BY 3.0 licence.

We calculate  $g$  (the coefficient related to losses in upward and downward travel through the water column, units:  $\text{m}^{-1}$ ) beginning with a relationship from Smith and Baker (1981, Eq. 5):

$$K = a + \frac{1}{2}b \quad (\text{S1})$$

where  $K$  is the diffuse attenuation coefficient for water,  $a$  is the absorption coefficient for water, and  $b$  is the backscattering coefficient for molecular (Rayleigh) scatter in water. Treating this as an equality yield “the lowest experimental value one could expect to encounter in natural freshwater based on laboratory measured values of the inherent optical properties for pure water.” Then, we plug this into Sneed and Hamilton (2007, Eq. 3):

$$g \approx K + aD_u \quad (\text{S2})$$

where  $D_u$  is an upwelling light distribution function or the reciprocal of the upwelling average cosine. By applying the assumption from Maritorena et al. (1994) that  $K_d \approx aD_u$ , we arrive at the following relationship between measured values ( $a$  and  $b$ ) and  $g$ :

$$g = 2a + b \quad (\text{S3})$$

To calculate  $g$ , we use an updated absorption coefficient ( $a$ ) from Pope and Fry (1997, Table 3) to replace the previously used  $a$  from Smith and Baker (1981, Table 1). We also use scattering coefficient ( $b$ ) from Buiteveld et al. (1994, Table 1) and OLI’s relative spectral response function (Barsi et al., 2014) to created an appropriately weighted average  $g$  for each OLI band. See Tables 1 and S1 for calculated values of  $g$ .

Table S1. Laboratory-based and in situ-derived water absorption coefficients for lake depth estimation using the physically based method ( $g$ , see Eqn. 1) and empirical method ( $a$ ,  $b$ , and  $c$ , see Eqns. 5-6). Regression statistics for lake depth estimates using field spectra convolved to emulate multispectral bands (correlation coefficient and root mean squared error) are also included.

| Satellite & Band       | Lab-based $g$ ( $m^{-1}$ ) | Regressed $g$ ( $m^{-1}$ ) | $r$    | RMSE (m) |
|------------------------|----------------------------|----------------------------|--------|----------|
| ASTER 1 (green) Gain H | 0.1584                     | 0.15                       | 0.7687 | 0.83     |
| ASTER 1 (green) Normal | 0.1584                     | 0.15                       | 0.7688 | 0.83     |
| ASTER 1 (green) Gain L | 0.1584                     | 0.15                       | 0.7675 | 0.83     |
| ASTER 2 (red) Gain H   | 0.8183                     | 0.82                       | 0.9551 | 0.31     |
| ASTER 2 (red) Normal   | 0.8183                     | 0.80                       | 0.9375 | 0.38     |
| ASTER 2 (red) Gain L   | 0.8183                     | 0.80                       | 0.9532 | 0.32     |
| MODIS 1 (red)          | 0.6922                     | 1.00                       | 0.9346 | 1.62     |
| MODIS 3 (blue)         | 0.0235                     | 0.02                       | 0.1424 | 5.27     |
| MODIS 4 (green)        | 0.1181                     | 0.25                       | 0.7375 | 0.93     |
| WV2 1 (coastal)        | 0.0159                     | 0.01                       | 0.0244 | 12.60    |
| WV2 2 (blue)           | 0.0317                     | 0.03                       | 0.2487 | 3.49     |
| WV2 3 (green)          | 0.1144                     | 0.13                       | 0.7271 | 0.95     |
| WV2 4 (yellow)         | 0.4749                     | 0.51                       | 0.9400 | 0.36     |
| WV2 5 (red)            | 0.7865                     | 0.81                       | 0.9627 | 0.28     |
| WV2 6 (red-edge)       | 2.1542                     | 1.00                       | 0.9134 | 0.41     |

Table S2. List of satellite imagery used in this paper's analysis.

| Landsat 8 Imagery |     |     |      |  |
|-------------------|-----|-----|------|--|
| Path              | Row | DOY | Year |  |
| 023               | 006 | 183 | 2013 |  |
| 023               | 006 | 199 | 2013 |  |
| 023               | 006 | 215 | 2013 |  |
| 023               | 006 | 231 | 2013 |  |
| 006               | 012 | 163 | 2014 |  |
| 006               | 012 | 195 | 2014 |  |
| 006               | 012 | 211 | 2014 |  |
| 006               | 013 | 163 | 2014 |  |
| 006               | 013 | 195 | 2014 |  |
| 006               | 013 | 211 | 2014 |  |
| 006               | 013 | 245 | 2014 |  |
| 006               | 014 | 163 | 2014 |  |
| 006               | 014 | 195 | 2014 |  |
| 006               | 014 | 211 | 2014 |  |
| 006               | 014 | 542 | 2014 |  |
| 006               | 015 | 163 | 2014 |  |
| 006               | 015 | 195 | 2014 |  |
| 006               | 015 | 211 | 2014 |  |
| 006               | 015 | 243 | 2014 |  |
| 007               | 012 | 218 | 2014 |  |
| 007               | 013 | 218 | 2014 |  |
| 007               | 014 | 170 | 2014 |  |
| 007               | 014 | 218 | 2014 |  |
| 008               | 011 | 161 | 2014 |  |
| 008               | 011 | 193 | 2014 |  |
| 008               | 012 | 161 | 2014 |  |
| 008               | 012 | 193 | 2014 |  |
| 009               | 011 | 152 | 2014 |  |
| 009               | 011 | 184 | 2014 |  |

|     |     |     |      |
|-----|-----|-----|------|
| 009 | 011 | 200 | 2014 |
| 009 | 011 | 216 | 2014 |
| 009 | 012 | 152 | 2014 |
| 009 | 012 | 184 | 2014 |
| 009 | 012 | 216 | 2014 |
| 010 | 012 | 159 | 2014 |
| 010 | 012 | 207 | 2014 |
| 010 | 012 | 223 | 2014 |
| 010 | 012 | 239 | 2014 |

WorldView Stereo Imagery

| Northwest or<br>Sermeq<br>Kujalleq<br>(Jakobshavn) | Sensor | Date<br><i>YYYY/MM/DD</i> | Scene 1          | Scene 2          |
|----------------------------------------------------|--------|---------------------------|------------------|------------------|
| SK / Jakobshavn                                    | WV-1   | 2013/07/05                | 102001002326E500 | 1020010024E0E700 |
| SK / Jakobshavn                                    | WV-2   | 2013/07/22                | 1030010024C6FC00 | 10300100245A7F00 |
| SK / Jakobshavn                                    | WV-2   | 2013/07/22                | 1030010025666700 | 1030010025C69600 |
| SK / Jakobshavn                                    | WV-2   | 2013/08/04                | 103001002757A900 | 10300100258CFE00 |
| SK / Jakobshavn                                    | WV-2   | 2013/08/19                | 1030010025CF8000 | 103001002591E600 |
| SK / Jakobshavn                                    | WV-2   | 2013/09/29                | 1030010027356800 | 1030010027356800 |
| Northwest                                          | WV-1   | 2012/03/12                | 1020010018240600 | 10200100195C7600 |
| Northwest                                          | WV-1   | 2013/03/22                | 1020010021B0C500 | 1020010021E40100 |
| Northwest                                          | WV-1   | 2013/03/26                | 102001002289F900 | 1020010020A0AB00 |
| Northwest                                          | WV-1   | 2013/07/19                | 10200100224D0500 | 1020010021E40100 |
| Northwest                                          | WV-1   | 2013/08/10                | 1020010024637300 | 1020010025955F00 |
| Northwest                                          | WV-2   | 2013/09/29                | 1030010027967F00 | 10300100276B3E00 |

As an experiment, WorldView Stereo DEMs were also used to calibrate all necessary coefficients for both the physically based and empirical methods (as opposed to using any information from the scene itself, such as ice albedo and optically deep water). Both ETM+ and OLI produced successful results with low errors with a variety of bands and band combinations (see Fig. S1 & Table S2). Only TOA reflectance was used in these regressions. Despite being collected on different days over separate sites, the ETM+ and OLI coefficients are very similar (see Fig. S2, Table S3). However, because all parameters are free, they are not directly comparable to the coefficients used in the rest of this study. Still, a wider range of lakes is likely necessary to build robust coefficients for ice sheet-wide application.

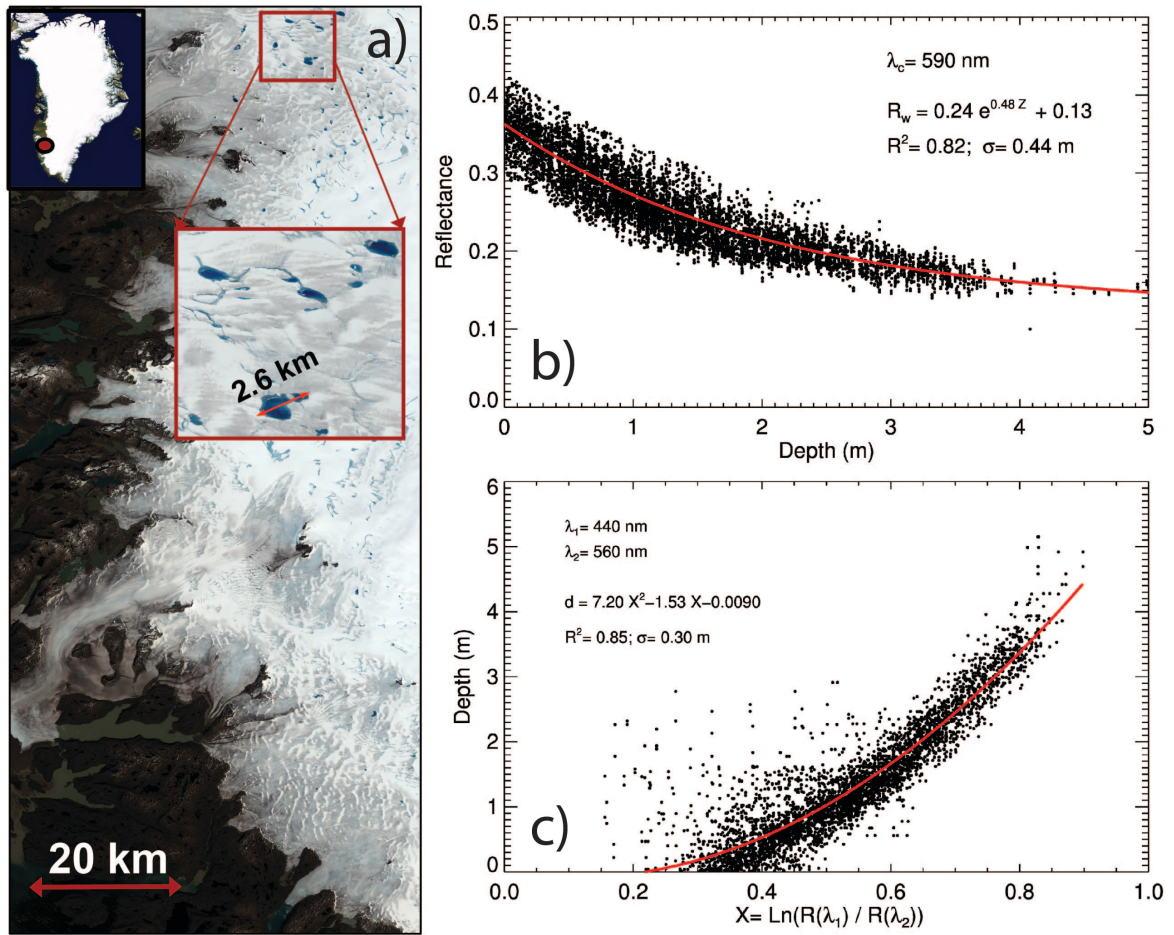

Figure S1. a) Map showing Landsat 8 OLI image and lakes used for calibration and validation. b) Water-leaving reflectance measured from OLI Band 8 (panchromatic) vs. post-drainage depths. c) Image-derived radiometric quantity measured from L8 OLI's coastal blue (Band 1) and green (Band 3) channels vs. post-drainage depths.

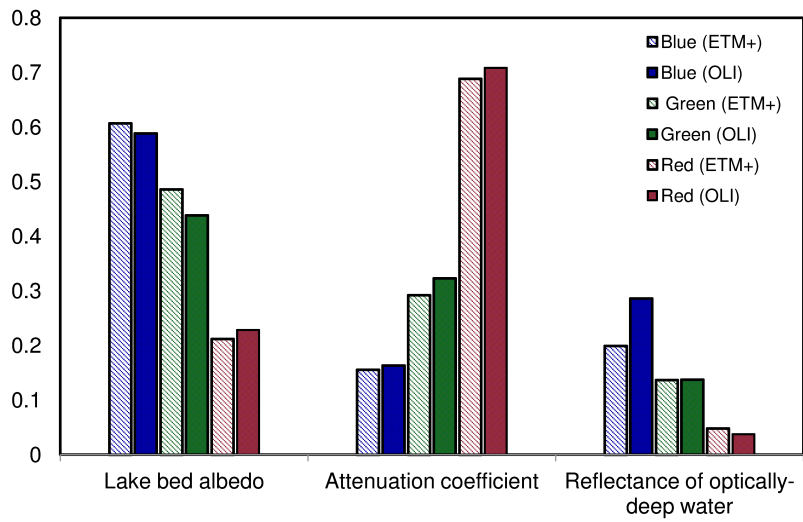

Figure S2. Physically based single-band coefficients for OLI and ETM+ sensors based on imagery collected over two separate sites and different days.

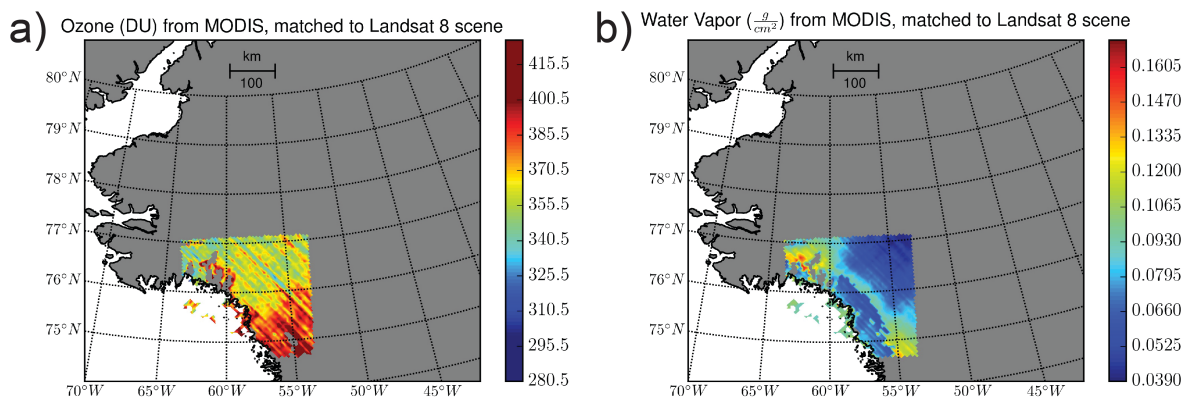

Figure S3 MODIS (a) ozone and (b) water vapor retrievals used for MODTRAN radiative transfer model sensitivity assessment of lake depth retrievals to path radiance on 18 July 2013. Data extent clipped to Landsat area of interest for northwest Greenland study region.



Table S3. Statistics on depth-retrieval based on OLI image data using various single- and dual-band methods.

| Band(s)     | Mean Error (m) | RMSE (m) | $r^2$ | Volumetric Error (%) |
|-------------|----------------|----------|-------|----------------------|
| 1 - Coastal | -0.39          | 1.19     | 0.52  | 27.3                 |
| 2 - Blue    | -0.24          | 0.91     | 0.72  | 16.3                 |
| 3 - Green   | -0.08          | 0.47     | 0.94  | 5.9                  |
| 4 - Red     | -0.22          | 0.43     | 0.93  | 14.0                 |
| 8 - Pan     | -0.10          | 0.45     | 0.96  | 7.2                  |
| 1 / 3       | 0.01           | 0.29     | 0.99  | 0.60                 |
| 1 / 4       | 0.00           | 0.45     | 0.99  | 1.98                 |
| 1 / 8       | 0.00           | 0.39     | 0.99  | 1.03                 |
| 2 / 3       | 0.01           | 0.30     | 0.99  | 0.66                 |
| 2 / 8       | 0.00           | 0.42     | 0.99  | 2.07                 |

Table S4. Landsat 7 and Landsat 8 coefficients for the physically based single-band model, as derived from the small training set described above. All parameters were left free.

| Band  | Parameter  | Landsat 7 (ETM+) | Landsat 8 (OLI) |
|-------|------------|------------------|-----------------|
| Blue  | $A_d$      | 0.6071           | 0.5882          |
|       | $g$        | 0.1556           | 0.1632          |
|       | $R_\infty$ | 0.1992           | 0.2861          |
| Green | $A_d$      | 0.48589045       | 0.4384          |
|       | $g$        | 0.29202123       | 0.3231          |
|       | $R_\infty$ | 0.13680709       | 0.1375          |
| Red   | $A_d$      | 0.21199443       | 0.2284          |
|       | $g$        | 0.68851528       | 0.7083          |
|       | $R_\infty$ | 0.047975375      | 0.0375          |

## References

Barsi, J. A., Lee, K., Kvaran, G., Markham, B. L. and Pedelty, J. A.: The Spectral Response of the Landsat-8 Operational Land Imager, *Remote Sens.*, 6(10), 10232–10251, doi:10.3390/rs61010232, 2014.

Buiteveld, H., Hakvoort, J. H. M. and Donze, M.: Optical properties of pure water, vol. 2258, pp. 174–183., 1994.

Maritorena, S., Morel, A. and Gentili, B.: Diffuse reflectance of oceanic shallow waters: Influence of water depth and bottom albedo, *Limnol. Oceanogr.*, 39(7), 1689–1703, 1994.

Pope, R. M. and Fry, E. S.: Absorption spectrum ~380–700 nm! of pure water. II. Integrating cavity measurements, *Appl. Opt.*, 36(33), 8710–8723, 1997.

Smith, R. C. and Baker, K. S.: Optical properties of the clearest natural waters (200-800 nm), *Appl. Opt.*, 20(2), 177–184, 1981.

Sneed, W. A. and Hamilton, G.: Evolution of melt pond volume on the surface of the Greenland Ice Sheet, *Geophys. Res. Lett.*, 34, L03501, 2007.
